# Supplementary material for: Sustainability and Productivity of Village Tank Cascade Systems: A Bibliometric Analysis and Knowledge Mapping
Source: MDPI journal article supplement (doi:10.3390/su16083360), 2024-04-17
Supplement: s1 [file s1]

**Table S1:** Key characteristics of past VTCSs research special reference to the sustainability and productivity dimensions

| Reference                      | Year | Publication Type |    |    |    | Research Type |   |   |   | Research design |    |    |   | Research cluster |   |    |    |    | Sustainability and productivity dimensions |    |    |    |                       |   |   |    |                     |    |    |   |                       |    |    |    |
|--------------------------------|------|------------------|----|----|----|---------------|---|---|---|-----------------|----|----|---|------------------|---|----|----|----|--------------------------------------------|----|----|----|-----------------------|---|---|----|---------------------|----|----|---|-----------------------|----|----|----|
|                                |      | JA               | BC | RR | CP | Em.           | E | D | C | QN              | QL | MM | 1 | 2                | 3 | 4a | 4b | 4c | Ecological productivity                    |    |    |    | Economic productivity |   |   |    | Social productivity |    |    |   | Cultural productivity |    |    |    |
|                                |      |                  |    |    |    |               |   |   |   |                 |    |    |   |                  |   |    |    |    | BD                                         | LH | WH | AC | FP                    | W | L | CV | FS                  | HH | PL | G | TK                    | BV | IV | RV |
| <i>Abeysingha et al. [1]</i>   | 2021 | *                |    |    |    |               | * |   |   |                 |    | *  |   |                  |   |    | *  | *  |                                            |    |    |    |                       | * |   |    | *                   |    |    |   |                       |    |    |    |
| <i>Abeysingha, et al. [2]</i>  | 2018 | *                |    |    |    |               |   | * | * |                 | *  |    |   |                  |   |    |    | *  | *                                          | *  |    |    |                       |   |   |    | *                   |    |    |   |                       |    |    |    |
| <i>Abeywardana et al. [3]</i>  | 2019 | *                |    |    |    |               | * |   |   |                 | *  |    |   |                  |   |    | *  |    |                                            |    |    |    | *                     |   |   |    |                     |    |    |   | *                     |    |    |    |
| <i>Abeywardana et al. [4]</i>  | 2019 | *                |    |    |    |               | * |   |   |                 | *  |    |   |                  |   |    | *  |    |                                            |    |    |    | *                     |   |   |    |                     |    |    |   |                       |    |    |    |
| <i>Abeywardana et al. [5]</i>  | 2018 | *                |    |    |    |               | * |   |   |                 | *  |    |   |                  |   |    | *  |    |                                            |    |    |    | *                     |   |   |    |                     |    |    |   |                       |    |    |    |
| <i>Aheeyar et al. [6]</i>      | 2023 | *                |    |    |    | *             |   |   |   |                 |    | *  | * |                  |   |    | *  |    |                                            |    |    |    |                       |   | * | *  |                     |    |    |   |                       |    |    |    |
| <i>Amerasinghe et al. [7]</i>  | 2001 |                  |    | *  |    | *             |   |   |   | *               |    |    |   |                  |   |    |    | *  |                                            |    |    |    |                       |   |   |    | *                   |    |    |   |                       |    |    |    |
| <i>Amerasinghe et al. [8]</i>  | 1997 | *                |    |    |    | *             |   |   |   | *               |    |    |   |                  |   |    |    | *  |                                            |    |    |    |                       |   |   |    | *                   |    |    |   |                       |    |    |    |
| <i>Anuradha et al. [9]</i>     | 2019 | *                |    |    |    | *             |   |   |   |                 |    | *  | * |                  |   |    |    |    |                                            |    |    | *  |                       |   | * |    |                     | *  |    |   |                       |    |    |    |
| <i>Ariyawanshe et al. [10]</i> | 2023 | *                |    |    |    | *             |   |   |   |                 |    | *  |   |                  |   |    | *  |    |                                            |    |    |    |                       |   |   |    |                     |    | *  |   |                       |    |    |    |
| <i>Avtar et al. [11]</i>       | 2013 | *                |    |    |    | *             |   |   |   | *               |    |    |   | *                | * |    |    |    |                                            |    |    |    | *                     |   |   |    |                     |    |    |   |                       |    |    |    |
| <i>Bebermeier et al. [12]</i>  | 2017 | *                |    |    |    | *             |   |   |   | *               |    |    |   |                  |   |    | *  |    |                                            |    |    |    | *                     |   |   |    |                     |    |    |   |                       |    |    |    |
| <i>Bebermeier et al. [13]</i>  | 2023 | *                |    |    |    |               | * |   |   |                 | *  |    |   |                  |   | *  | *  |    |                                            |    |    |    | *                     |   |   |    |                     |    |    |   |                       |    |    |    |
| <i>Chandrajith et al. [14]</i> | 2008 | *                |    |    |    | *             |   |   |   | *               |    |    |   |                  |   |    | *  | *  |                                            |    | *  |    | *                     |   |   |    | *                   |    |    |   |                       |    |    |    |
| <i>Dayananda et al. [15]</i>   | 2021 | *                |    |    |    | *             |   |   |   | *               |    |    |   | *                |   |    | *  |    |                                            |    |    | *  | *                     |   |   |    |                     |    |    |   |                       |    |    |    |
| <i>Dayananda et al. [16]</i>   | 2023 | *                |    |    |    | *             |   |   |   | *               |    |    |   | *                |   |    | *  |    |                                            |    |    | *  | *                     |   |   |    |                     |    |    |   |                       |    |    |    |
| <i>De Silva et al. [17]</i>    | 2002 | *                |    |    |    |               | * |   |   | *               |    |    |   | *                |   |    |    |    |                                            |    |    |    | *                     |   |   |    | *                   |    |    |   |                       |    |    |    |
| <i>Dharmasena [18]</i>         | 1994 | *                |    |    |    | *             |   |   |   | *               |    |    | * | *                |   | *  | *  |    |                                            | *  |    | *  | *                     |   |   |    | *                   |    |    |   |                       |    |    |    |
| <i>Dharmasena [19]</i>         | 2010 |                  | *  |    |    |               | * |   |   |                 | *  |    |   |                  |   | *  | *  |    | *                                          | *  | *  |    |                       |   |   |    |                     |    |    |   |                       |    |    |    |
| <i>Dharmasena [20]</i>         | 2020 |                  | *  |    |    |               | * | * |   | *               |    |    | * |                  |   |    | *  |    | *                                          | *  | *  |    |                       |   |   |    |                     |    |    |   |                       |    |    |    |
| <i>Dharma-wardana [21]</i>     | 2015 | *                |    |    |    |               | * | * |   |                 | *  |    |   |                  |   |    |    | *  |                                            |    |    | *  |                       |   |   |    | *                   |    |    |   |                       |    |    |    |
| <i>Dilini et al. [22]</i>      | 2021 | *                |    |    |    | *             |   |   |   |                 | *  | *  |   |                  |   |    |    |    |                                            |    |    |    |                       |   | * | *  |                     | *  |    |   |                       |    |    |    |
| <i>Dissanayake [23]</i>        | 2022 |                  | *  |    |    | *             |   |   |   |                 | *  |    |   |                  |   | *  | *  |    | *                                          | *  | *  |    |                       |   |   |    |                     |    |    |   |                       |    |    |    |
| <i>Dissanayake et al. [24]</i> | 2023 | *                |    |    |    | *             |   |   |   |                 | *  |    |   |                  |   | *  | *  | *  | *                                          | *  | *  |    |                       |   |   |    |                     |    |    |   |                       |    |    |    |
| <i>Fernando et al. [25]</i>    | 2018 |                  |    |    | *  |               | * |   |   |                 | *  |    |   |                  |   | *  |    | *  |                                            | *  | *  |    |                       |   |   |    |                     |    |    |   |                       |    |    |    |
| <i>Fernando et al. [26]</i>    | 2021 |                  |    |    | *  | *             |   |   |   |                 | *  |    |   |                  |   |    | *  | *  |                                            |    | *  |    |                       |   |   |    | *                   |    |    |   |                       |    |    |    |

JA = Journal article  
BC = Book chapter  
RR = Research report  
CP = Conference proceedings

Em. = Empirical  
E = Explorative  
D = Descriptive  
E = Conceptual

QN = Quantitative  
QL = Qualitative  
MM = Mixed methods

1 = Climate change & food security  
2 = Irrigation water supply & management  
3 = Agricultural water demand & supply  
4a = Spatial characteristics  
4b = Sustainability performance  
4c = Water quality & governance

BD = Biodiversity  
LH = Land habitats  
WH = Water habitats  
AC = Atmosphere/Climate  
FP = Food production  
W= Water  
L = Land  
CV= Climate vulnerability

FS = Food security  
HH = Human health  
PL = People/Livelihoods  
G = Gender  
TK = Traditional knowledge  
BV = Biocultural values  
IV = Intrinsic values  
RV = Relational values

| Reference                 | Year | Publication Type |    |    |    | Research Type |   |   |   | Research design |    |    |   | Research cluster |   |    |    |    |    |    | Sustainability and productivity dimensions |    |    |   |                       |    |    |    |                     |   |    |    |                       |    |  |  |
|---------------------------|------|------------------|----|----|----|---------------|---|---|---|-----------------|----|----|---|------------------|---|----|----|----|----|----|--------------------------------------------|----|----|---|-----------------------|----|----|----|---------------------|---|----|----|-----------------------|----|--|--|
|                           |      |                  |    |    |    |               |   |   |   |                 |    |    |   |                  |   |    |    |    |    |    | Ecological productivity                    |    |    |   | Economic productivity |    |    |    | Social productivity |   |    |    | Cultural productivity |    |  |  |
|                           |      | JA               | BC | RR | CP | Em.           | E | D | C | QN              | QL | MM | 1 | 2                | 3 | 4a | 4b | 4c | BD | LH | WH                                         | AC | FP | W | L                     | CV | FS | HH | PL                  | G | TK | BV | IV                    | RV |  |  |
| Gangadhara et al. [27]    | 2005 |                  |    |    | *  | *             |   |   |   |                 | *  |    |   |                  |   | *  |    |    |    |    |                                            |    |    | * | *                     |    |    |    |                     |   |    |    |                       |    |  |  |
| Geekiyanage et al. [28]   | 2013 | *                |    |    |    |               |   | * | * |                 | *  |    |   |                  | * | *  |    |    | *  |    |                                            |    |    |   |                       |    |    |    |                     |   |    |    |                       |    |  |  |
| Gilliland et al. [29]     | 2013 | *                |    |    |    | *             |   |   |   |                 | *  |    | * |                  | * | *  |    |    |    |    |                                            |    | *  |   |                       |    |    |    |                     |   |    |    |                       |    |  |  |
| Godage et al. [30]        | 2021 |                  |    |    | *  | *             |   |   |   | *               |    | *  |   |                  |   | *  |    |    |    |    |                                            | *  |    |   |                       |    |    |    |                     |   |    |    |                       |    |  |  |
| Gunarathna et al. [31]    | 2014 | *                |    |    |    | *             |   |   |   | *               |    |    |   | *                |   |    |    |    |    |    |                                            | *  | *  |   |                       |    | *  |    |                     |   |    |    |                       |    |  |  |
| Gunasekara et al. [32]    | 2023 | *                |    |    |    | *             |   |   |   |                 | *  | *  |   |                  |   |    |    |    |    |    |                                            | *  | *  |   |                       |    |    |    |                     |   |    |    |                       |    |  |  |
| Hemachandra et al. [33]   | 2022 |                  | *  |    |    | *             |   |   |   | *               |    |    |   | *                | * |    | *  |    | *  | *  |                                            | *  | *  |   |                       | *  |    | *  |                     |   |    |    |                       |    |  |  |
| Hemachandra et al. [34]   | 2021 | *                |    |    |    | *             |   |   |   | *               |    |    | * |                  |   |    |    |    |    |    |                                            |    |    |   | *                     |    |    |    |                     |   |    |    |                       |    |  |  |
| Herath et al. [35]        | 2018 |                  | *  |    |    | *             |   |   |   |                 | *  |    |   |                  |   | *  |    |    | *  |    |                                            | *  | *  |   |                       |    |    |    |                     |   |    |    |                       |    |  |  |
| Hettiarachchi et al. [36] | 2021 |                  |    |    | *  | *             |   |   |   | *               |    |    | * |                  |   |    |    |    | *  |    |                                            |    |    |   |                       |    |    |    |                     |   |    |    |                       |    |  |  |
| Imbulana et al. [37]      | 2020 | *                |    |    |    | *             |   |   |   | *               |    |    |   |                  | * |    |    |    |    |    |                                            |    | *  |   |                       |    |    |    |                     |   |    |    |                       |    |  |  |
| Itakura [38]              | 1995 |                  |    | *  |    | *             |   |   |   | *               |    |    |   |                  | * |    |    |    |    |    |                                            |    | *  |   |                       |    |    |    |                     |   |    |    |                       |    |  |  |
| Itakura et al. [39]       | 1993 |                  |    | *  |    | *             |   |   |   | *               |    |    |   |                  | * |    |    |    |    |    |                                            |    | *  |   |                       |    |    |    |                     |   |    |    |                       |    |  |  |
| Izumi et al. [40]         | 2021 | *                |    |    |    | *             |   |   |   | *               |    |    |   | *                |   |    |    |    |    |    |                                            |    | *  |   | *                     |    |    |    |                     |   |    |    |                       |    |  |  |
| Jayakody et al. [41]      | 2004 | *                |    |    |    | *             |   |   |   | *               |    |    |   |                  | * |    |    |    |    |    |                                            |    | *  |   |                       |    |    |    |                     |   |    |    |                       |    |  |  |
| Jayasena et al. [42]      | 2011 | *                |    |    |    | *             |   |   |   | *               |    |    |   |                  |   | *  |    |    |    |    |                                            |    | *  |   |                       |    |    |    |                     |   |    |    |                       |    |  |  |
| Jayasiri et al. [43]      | 2023 | *                |    |    |    | *             |   |   |   |                 | *  |    |   | *                |   |    |    |    |    |    |                                            |    | *  |   |                       |    |    |    |                     |   |    |    |                       |    |  |  |
| Jayasuriya et al. [44]    | 2017 | *                |    |    |    | *             |   |   |   |                 | *  |    |   |                  |   | *  | *  |    |    | *  |                                            |    |    |   |                       |    |    |    |                     |   |    |    |                       |    |  |  |
| Jayathilaka et al. [45]   | 2021 |                  |    |    | *  | *             |   |   |   |                 | *  | *  |   |                  |   |    | *  |    |    |    |                                            |    |    |   |                       | *  | *  |    |                     |   |    |    |                       |    |  |  |
| Jayatilaka et al. [46]    | 2001 |                  |    | *  |    | *             |   |   |   | *               |    |    |   |                  | * |    |    |    |    |    |                                            |    | *  |   |                       |    |    |    |                     |   |    |    |                       |    |  |  |
| Jayatilaka et al. [47]    | 2003 | *                |    |    |    | *             |   |   |   | *               |    |    |   |                  | * |    |    |    |    |    |                                            |    | *  |   |                       |    |    |    |                     |   |    |    |                       |    |  |  |
| Kanthilanka et al. [48]   | 2023 | *                |    |    |    | *             |   |   |   |                 | *  |    |   |                  |   | *  | *  |    |    |    |                                            |    | *  |   |                       | *  |    |    |                     |   |    |    |                       |    |  |  |
| Karalliyaddaa et al. [49] | 2023 | *                |    |    |    | *             |   |   |   |                 | *  |    |   |                  |   | *  |    |    | *  |    |                                            |    |    | * |                       |    |    |    |                     |   |    |    |                       |    |  |  |
| Kariyawasam [50]          | 1989 | *                |    |    |    | *             |   |   |   | *               |    |    | * | *                |   |    |    |    |    |    |                                            | *  |    |   |                       |    |    |    |                     |   |    |    |                       |    |  |  |
| Kariyawasam et al. [51]   | 2021 | *                |    |    |    | *             |   |   |   | *               |    |    | * |                  |   |    |    |    |    | *  |                                            |    | *  |   |                       |    |    |    |                     |   |    |    |                       |    |  |  |
| Kekulandala et al. [52]   | 2020 | *                |    |    |    |               |   | * | * |                 | *  |    |   | *                |   | *  | *  |    |    |    |                                            |    | *  | * |                       |    |    | *  |                     |   |    |    |                       |    |  |  |

JA = Journal article  
BC = Book chapter  
RR = Research report  
CP = Conference proceedings

Em. = Empirical  
E = Explorative  
D = Descriptive  
E = Conceptual

QN = Quantitative  
QL = Qualitative  
MM = Mixed method

1 = Climate change & food security  
2 = Irrigation water supply & management  
3 = Agricultural water demand & supply  
4a = Spatial characteristics  
4b = Sustainability performance  
4c = Water quality & governance

BD = Biodiversity  
LH = Land habitats  
WH = Water habitats  
AC = Atmosphere/Climate  
FP = Food production  
W = Water  
L = Land  
CV = Climate vulnerability

FS = Food security  
HH = Human health  
PL = People/Livelihoods  
G = Gender  
TK = Traditional knowledge  
BV = Biocultural values  
IV = Intrinsic values  
RV = Relational values

| Reference                 | Year | Publication Type |    |    |    | Research Type |   |   |   | Research design |    |    |   | Research cluster |   |    |    |    |    | Sustainability and productivity dimensions |    |    |    |                       |   |    |    |                     |    |   |    |                       |    |    |  |
|---------------------------|------|------------------|----|----|----|---------------|---|---|---|-----------------|----|----|---|------------------|---|----|----|----|----|--------------------------------------------|----|----|----|-----------------------|---|----|----|---------------------|----|---|----|-----------------------|----|----|--|
|                           |      |                  |    |    |    |               |   |   |   |                 |    |    |   |                  |   |    |    |    |    | Ecological productivity                    |    |    |    | Economic productivity |   |    |    | Social productivity |    |   |    | Cultural productivity |    |    |  |
|                           |      | JA               | BC | RR | CP | Em.           | E | D | C | QN              | QL | MM | 1 | 2                | 3 | 4a | 4b | 4c | BD | LH                                         | WH | AC | FP | W                     | L | CV | FS | HH                  | PL | G | TK | BV                    | IV | RV |  |
| Kekulandala et al. [53]   | 2023 | *                |    |    |    | *             |   |   |   |                 | *  |    | * |                  | * | *  |    |    |    |                                            |    | *  | *  |                       |   |    |    | *                   |    |   |    |                       |    |    |  |
| Köpke et al. [54]         | 2019 | *                |    |    |    | *             |   |   |   |                 | *  |    | * |                  | * | *  |    |    |    |                                            |    |    | *  |                       |   |    | *  |                     |    |   |    |                       |    |    |  |
| Kowshayini et al. [55]    | 2023 | *                |    |    |    | *             |   |   |   | *               |    |    |   | *                |   |    |    |    |    | *                                          |    |    | *  |                       |   |    |    |                     |    |   |    |                       |    |    |  |
| Kulasinghe et al. [56]    | 2022 | *                |    |    |    | *             |   |   |   | *               |    |    |   | *                |   |    |    |    |    | *                                          |    |    | *  | *                     | * |    |    |                     |    |   |    |                       |    |    |  |
| Kumari et al. [57]        | 2018 | *                |    |    |    | *             |   |   |   | *               |    |    |   | *                |   |    | *  |    |    |                                            |    |    | *  |                       |   |    |    |                     |    |   |    |                       |    |    |  |
| Kumari et al. [58]        | 2019 | *                |    |    |    | *             |   |   |   | *               |    |    |   | *                |   |    | *  |    |    |                                            |    | *  | *  |                       |   |    |    |                     |    |   |    |                       |    |    |  |
| Kumari et al. [59]        | 2013 | *                |    |    |    | *             |   |   |   | *               |    |    |   | *                |   |    | *  |    |    |                                            |    | *  | *  |                       |   |    |    |                     |    |   |    |                       |    |    |  |
| Lasanthika et al. [60]    | 2021 |                  |    |    | *  | *             |   |   |   | *               |    |    |   |                  | * |    | *  |    |    | *                                          |    |    |    |                       | * |    |    |                     |    |   |    |                       |    |    |  |
| Madduma Bandara [61]      | 1985 |                  | *  |    |    |               |   | * | * |                 | *  |    |   |                  |   | *  | *  |    |    | *                                          | *  |    | *  | *                     |   |    |    |                     |    |   |    |                       |    |    |  |
| Madduma Bandara [62]      | 1995 |                  |    |    | *  |               |   |   | * |                 | *  |    |   |                  |   | *  | *  |    |    |                                            | *  |    | *  |                       |   |    |    | *                   |    |   |    |                       |    |    |  |
| Mahatantila et al. [63]   | 2008 | *                |    |    |    | *             |   |   |   | *               |    |    |   | *                |   | *  |    | *  |    | *                                          |    | *  |    | *                     |   |    |    |                     |    |   |    |                       |    |    |  |
| Mahatantila et al. [64]   | 2010 |                  | *  |    |    | *             |   |   |   | *               |    |    |   | *                |   | *  |    | *  |    |                                            | *  |    | *  |                       |   |    |    |                     |    |   |    |                       |    |    |  |
| Marambe et al. [65]       | 2012 |                  | *  |    |    |               | * | * |   |                 | *  |    | * |                  |   |    |    |    | *  |                                            |    |    | *  |                       |   |    |    |                     |    |   |    |                       |    |    |  |
| Matsuno et al. [66]       | 2003 | *                |    |    |    | *             |   |   |   | *               |    |    |   |                  | * |    |    |    |    |                                            |    |    | *  | *                     |   |    |    |                     |    |   |    |                       |    |    |  |
| Melles et al. [67]        | 2020 | *                |    |    |    |               |   |   | * |                 | *  |    |   |                  |   |    | *  |    | *  |                                            | *  |    |    |                       |   |    |    | *                   |    |   |    |                       |    |    |  |
| Menike et al. [68]        | 2021 |                  |    |    | *  | *             |   |   |   | *               |    |    | * |                  |   |    |    |    |    |                                            | *  |    | *  |                       |   |    |    |                     |    |   |    |                       |    |    |  |
| Molden et al. [69]        | 1999 | *                |    |    |    |               |   |   | * |                 |    | *  |   |                  | * |    |    |    |    |                                            |    |    | *  | *                     |   |    |    |                     |    |   |    |                       |    |    |  |
| Murray et al. [70]        | 2000 |                  |    | *  |    | *             |   |   |   |                 | *  | *  | * |                  |   |    |    |    |    |                                            |    | *  |    |                       |   |    |    |                     |    |   |    |                       |    |    |  |
| Nanthakumaran et al. [71] | 2022 | *                |    |    |    | *             |   |   |   |                 | *  |    |   | *                |   |    |    |    |    |                                            |    | *  | *  |                       |   |    |    |                     |    |   |    |                       |    |    |  |
| Nayanathara et al. [72]   | 2021 |                  |    |    | *  | *             |   |   |   | *               |    | *  |   |                  |   |    |    |    |    |                                            |    | *  |    |                       |   | *  |    |                     |    |   |    |                       |    |    |  |
| Panabokke et al. [73]     | 2002 |                  | *  |    |    |               |   | * | * |                 | *  |    |   |                  |   | *  | *  |    |    | *                                          |    | *  | *  |                       |   |    |    |                     |    |   |    |                       |    |    |  |
| Panabokke et al. [74]     | 2008 |                  |    | *  |    | *             |   |   |   | *               |    |    |   | *                |   |    |    |    |    | *                                          |    | *  |    |                       |   |    |    |                     |    |   |    |                       |    |    |  |
| Paranage [75]             | 2018 | *                |    |    |    | *             |   |   |   | *               |    |    | * |                  |   |    |    |    |    |                                            |    | *  | *  |                       |   |    |    |                     |    |   |    |                       |    |    |  |
| Perera et al. [76]        | 2020 |                  |    |    | *  | *             |   |   |   | *               |    |    | * |                  |   |    |    |    |    |                                            |    | *  |    | *                     |   | *  |    | *                   |    |   |    |                       |    |    |  |
| Perera et al. [77]        | 2020 | *                |    |    |    | *             |   |   |   |                 | *  | *  | * |                  |   |    |    |    | *  |                                            |    | *  | *  |                       |   |    |    |                     |    |   |    |                       |    |    |  |

JA = Journal article  
BC = Book chapter  
RR = Research report  
CP = Conference proceedings

Em. = Empirical  
E = Explorative  
D = Descriptive  
E = Conceptual

QN = Quantitative  
QL = Qualitative  
MM = Mixed methods

1 = Climate change & food security  
2 = Irrigation water supply & management  
3 = Agricultural water demand & supply  
4a = Spatial characteristics  
4b = Sustainability performance  
4c = Water quality & governance

BD = Biodiversity  
LH = Land habitats  
WH = Water habitats  
AC = Atmosphere/Climate  
FP = Food production  
W= Water  
L = Land  
CV = Climate vulnerability

FS = Food security  
HH = Human health  
PL = People/Livelihoods  
G = Gender  
TK = Traditional knowledge  
BV = Biocultural values  
IV = Intrinsic values  
RV = Relational values

| Reference                  | Year | Publication Type |    |    |    | Research Type |   |   |   | Research design |    |    |   | Research cluster |   |    |    |    |    |    | Sustainability and productivity dimensions |    |    |   |                       |    |    |    |                     |   |    |    |                       |    |  |  |
|----------------------------|------|------------------|----|----|----|---------------|---|---|---|-----------------|----|----|---|------------------|---|----|----|----|----|----|--------------------------------------------|----|----|---|-----------------------|----|----|----|---------------------|---|----|----|-----------------------|----|--|--|
|                            |      |                  |    |    |    |               |   |   |   |                 |    |    |   |                  |   |    |    |    |    |    | Ecological productivity                    |    |    |   | Economic productivity |    |    |    | Social productivity |   |    |    | Cultural productivity |    |  |  |
|                            |      | JA               | BC | RR | CP | Em.           | E | D | C | QN              | QL | MM | 1 | 2                | 3 | 4a | 4b | 4c | BD | LH | WH                                         | AC | FP | W | L                     | CV | FS | HH | PL                  | G | TK | BV | IV                    | RV |  |  |
| Perera et al. [78]         | 2021 | *                |    |    |    | *             |   |   |   |                 | *  |    | * |                  |   |    |    |    |    | *  |                                            |    | *  |   |                       |    |    | *  |                     |   |    |    |                       |    |  |  |
| Perera et al. [79]         | 2021 | *                |    |    |    | *             |   |   |   | *               |    |    | * |                  |   |    |    |    |    |    |                                            |    |    |   | *                     |    |    | *  |                     |   |    |    |                       |    |  |  |
| Ranasinghe et al. [80]     | 2023 | *                |    |    |    | *             |   |   |   |                 | *  |    | * |                  |   |    |    |    |    |    |                                            | *  |    |   | *                     |    |    | *  |                     |   |    |    |                       |    |  |  |
| Ratnayake et al. [81]      | 2023 | *                |    |    |    |               | * |   |   | *               |    |    | * |                  |   |    |    |    |    |    |                                            | *  |    | * | *                     |    |    |    |                     |   |    |    |                       |    |  |  |
| Ratnayake et al. [82]      | 2022 | *                |    |    |    | *             |   |   |   |                 | *  |    | * |                  |   | *  | *  |    | *  | *  | *                                          |    |    |   |                       |    |    |    |                     | * |    | *  | *                     |    |  |  |
| Ratnayake et al. [83]      | 2021 | *                |    |    |    | *             |   |   |   |                 | *  |    |   |                  | * | *  |    |    | *  | *  | *                                          |    |    |   |                       | *  |    |    | *                   | * |    |    |                       |    |  |  |
| Ratnayake et al. [84]      | 2023 |                  | *  |    |    |               | * | * |   |                 | *  |    | * |                  |   |    |    | *  |    |    |                                            | *  |    |   |                       | *  |    |    |                     |   |    |    |                       |    |  |  |
| Saase et al. [85]          | 2020 | *                |    |    |    | *             |   |   |   | *               |    |    | * |                  |   |    |    |    |    |    |                                            |    | *  |   | *                     |    |    |    |                     |   |    |    |                       |    |  |  |
| Sakthivadivel et al. [86]  | 1999 | *                |    |    |    |               |   | * |   |                 | *  |    | * |                  | * |    |    |    |    |    |                                            |    | *  | * |                       |    |    | *  | *                   |   |    |    |                       |    |  |  |
| Sakthivadivel et al. [87]  | 1997 |                  |    | *  |    | *             |   |   |   |                 | *  |    | * |                  |   |    |    |    |    |    |                                            |    | *  | * |                       |    |    | *  | *                   |   |    |    |                       |    |  |  |
| Schütt et al. [88]         | 2013 | *                |    |    |    | *             |   |   |   |                 | *  |    |   |                  | * | *  |    |    |    |    |                                            |    | *  | * |                       |    |    |    |                     |   |    |    |                       |    |  |  |
| Seenithamby et al. [89]    | 2021 | *                |    |    |    | *             |   |   |   |                 | *  |    |   |                  | * |    |    |    | *  |    |                                            |    |    | * |                       |    |    |    |                     |   |    |    |                       |    |  |  |
| Senadeera et al. [90]      | 2021 |                  |    |    | *  | *             |   |   |   | *               |    |    |   | *                |   |    |    |    |    |    |                                            | *  | *  | * |                       |    |    |    |                     |   |    |    |                       |    |  |  |
| Senaratne et al. [91]      | 2011 |                  |    | *  |    | *             |   |   |   |                 | *  |    |   | *                |   |    |    |    |    |    |                                            |    | *  |   |                       |    |    |    |                     |   |    |    |                       |    |  |  |
| Sewwandi et al. [92]       | 2023 | *                |    |    |    | *             |   |   |   | *               |    |    |   |                  |   |    |    | *  |    |    | *                                          |    |    |   |                       |    |    |    |                     |   |    |    |                       |    |  |  |
| Shannon et al. [93]        | 2007 | *                |    |    |    |               |   |   | * |                 | *  |    |   |                  | * | *  |    |    |    |    |                                            | *  | *  | * | *                     | *  |    | *  |                     |   |    |    |                       |    |  |  |
| Shinogi et al. [94]        | 1998 |                  |    |    | *  | *             |   |   |   | *               |    |    |   |                  | * |    |    |    |    |    |                                            |    | *  |   |                       |    |    |    |                     |   |    |    |                       |    |  |  |
| Silva et al. [95]          | 2021 |                  |    |    | *  | *             |   |   |   |                 | *  |    | * |                  |   |    |    |    |    |    |                                            |    |    |   |                       | *  | *  |    |                     |   |    |    |                       |    |  |  |
| Sirimanna et al. [96]      | 2021 | *                |    |    |    | *             |   |   |   | *               |    |    |   |                  | * |    |    |    |    |    |                                            | *  | *  |   |                       |    |    |    |                     |   |    |    |                       |    |  |  |
| Sirimanna et al. [97]      | 2022 | *                |    |    |    | *             |   |   |   |                 | *  |    | * | *                | * | *  |    |    | *  |    |                                            | *  |    |   |                       |    |    |    |                     |   |    |    |                       |    |  |  |
| Sitisekara et al. [98]     | 2021 |                  |    |    | *  | *             |   |   |   |                 | *  |    | * |                  |   |    |    |    |    |    |                                            |    |    |   |                       | *  | *  |    |                     |   |    |    |                       |    |  |  |
| Sulochana et al. [99]      | 2021 |                  |    |    | *  | *             |   |   |   | *               |    |    |   | *                |   |    |    |    |    | *  |                                            |    | *  |   |                       |    |    |    |                     |   |    |    |                       |    |  |  |
| Thilakarathne et al. [100] | 2018 |                  |    |    | *  | *             |   |   |   | *               |    |    |   | *                |   |    |    |    |    | *  |                                            | *  |    | * |                       |    |    |    |                     |   |    |    |                       |    |  |  |
| Thilakasiri et al. [101]   | 2015 | *                |    |    |    | *             |   |   |   |                 | *  |    | * |                  | * |    |    |    |    | *  |                                            |    |    |   |                       |    |    |    |                     |   |    |    |                       |    |  |  |
| Vidana Gamage et al. [102] | 2021 |                  |    |    | *  | *             |   |   |   | *               |    | *  |   |                  | * |    |    |    | *  |    |                                            |    |    |   |                       |    |    |    |                     |   |    |    |                       |    |  |  |

JA = Journal article  
BC = Book chapter  
RR = Research report  
CP = Conference proceedings

Em. = Empirical  
E = Explorative  
D = Descriptive  
E = Conceptual

QN = Quantitative  
QL = Qualitative  
MM = Mixed methods

1 = Climate change & food security  
2 = Irrigation water supply & management  
3 = Agricultural water demand & supply  
4a = Spatial characteristics  
4b = Sustainability performance  
4c = Water quality & governance

BD = Biodiversity  
LH = Land habitats  
WH = Water habitats  
AC = Atmosphere/Climate  
FP = Food production  
W = Water  
L = Land  
CV = Climate vulnerability

FS = Food security  
HH = Human health  
PL = People/Livelihoods  
G = Gender  
TK = Traditional knowledge  
BV = Biocultural values  
IV = Intrinsic values  
RV = Relational values

| Reference                          | Year | Publication Type |    |    |    | Research Type |   |   |   | Research design |    |    |   | Research cluster |   |    |    |    |    |    | Sustainability and productivity dimensions |    |    |   |                       |    |    |    |                     |   |    |    |                       |    |  |  |
|------------------------------------|------|------------------|----|----|----|---------------|---|---|---|-----------------|----|----|---|------------------|---|----|----|----|----|----|--------------------------------------------|----|----|---|-----------------------|----|----|----|---------------------|---|----|----|-----------------------|----|--|--|
|                                    |      |                  |    |    |    |               |   |   |   |                 |    |    |   |                  |   |    |    |    |    |    | Ecological productivity                    |    |    |   | Economic productivity |    |    |    | Social productivity |   |    |    | Cultural productivity |    |  |  |
|                                    |      | JA               | BC | RR | CP | Em.           | E | D | C | QN              | QL | MM | 1 | 2                | 3 | 4a | 4b | 4c | BD | LH | WH                                         | AC | FP | W | L                     | CV | FS | HH | PL                  | G | TK | BV | IV                    | RV |  |  |
| <i>Vidanage et al. [103]</i>       | 2022 |                  | *  |    |    |               |   | * | * |                 | *  |    |   |                  |   |    | *  |    |    |    | *                                          | *  | *  |   | *                     |    |    |    |                     |   |    |    |                       |    |  |  |
| <i>Weerahewa et al. [104]</i>      | 2022 | *                |    |    |    | *             |   |   |   |                 | *  |    |   |                  |   |    | *  |    |    |    |                                            | *  |    | * |                       |    |    |    |                     |   |    |    |                       |    |  |  |
| <i>Welgama et al. [105]</i>        | 2012 | *                |    |    |    | *             |   |   |   |                 | *  |    |   |                  | * |    |    |    |    |    |                                            | *  | *  |   |                       |    |    |    |                     |   |    |    |                       |    |  |  |
| <i>Wickramasinghe et al. [106]</i> | 2023 | *                |    |    |    | *             |   |   |   |                 | *  | *  |   |                  |   |    |    |    |    | *  |                                            |    |    |   | *                     | *  |    |    |                     |   |    |    |                       |    |  |  |
| <i>Wijekoon et al. [107]</i>       | 2016 |                  |    |    | *  | *             |   |   |   |                 | *  |    |   |                  |   | *  | *  |    |    | *  |                                            | *  | *  | * |                       |    |    |    |                     |   |    |    |                       |    |  |  |
| <i>Wijesundara et al. [108]</i>    | 2013 | *                |    |    |    | *             |   |   |   | *               |    |    |   |                  |   |    |    | *  |    |    | *                                          |    | *  |   |                       |    |    | *  |                     |   |    |    |                       |    |  |  |
| <i>Wijesundara et al. [109]</i>    | 2014 | *                |    |    |    | *             |   |   |   | *               |    |    |   |                  |   | *  | *  |    |    | *  |                                            | *  | *  |   |                       |    |    | *  |                     |   |    |    |                       |    |  |  |

JA = Journal article  
BC = Book chapter  
RR = Research report  
CP = Conference proceedings

Em. = Empirical  
E = Explorative  
D = Descriptive  
E = Conceptual

QN = Quantitative  
QL = Qualitative  
MM = Mixed methods

1 = Climate change & food security  
2 = Irrigation water supply & management  
3 = Agricultural water demand & supply  
4a = Spatial characteristics  
4b = Sustainability performance  
4c = Water quality & governance

BD = Biodiversity  
LH = Land habitats  
WH = Water habitats  
AC = Atmosphere/Climate  
FP = Food production  
W= Water  
L = Land  
CV = Climate vulnerability

FS = Food security  
HH = Human health  
PL = People/Livelihoods  
G = Gender  
TK = Traditional knowledge  
BV = Biocultural values  
IV = Intrinsic values  
RV = Relational values

## References

1. Abeysingha, N.; Dissanayake, S.; Sumanaweera, S.; De Silva, S. Cascade tank water quality management: A case study in Thirappane tank cascade system, Sri Lanka. *J. Environ. Earth Sci.* **2021**, *3*, 59–70.
2. Abeysingha, N.; Dassanayake, K.; Weeraratna, C. Will restoration of ecological functions of tank cascade system contribute to reduce CKDu in Sri Lanka? A review. *Environ. Manag. Sustain. Dev.* **2018**, *7*, 60–81.
3. Abeywardana, N.; Pitawala, H.; Schütt, B.; Bebermeier, W. Evolution of the dry zone water harvesting and management systems in Sri Lanka during the Anuradhapura Kingdom; a study based on ancient chronicles and lithic inscriptions. *Water Hist.* **2019**, *11*, 75–103.
4. Abeywardana, N.; Schütt, B.; Wagalawatta, T.; Bebermeier, W. Indigenous agricultural systems in the dry zone of Sri Lanka: Management transformation assessment and sustainability. *Sustainability* **2019**, *11*, 910.
5. Abeywardana, N.; Bebermeier, W.; Schütt, B. Ancient water management and governance in the dry zone of Sri Lanka until abandonment, and the influence of colonial politics during reclamation. *Water* **2018**, *10*, 1746.
6. Aheeyar, M.; Amarasinghe, U.; Amarnath, G.; Alahacoon, N. Factors affecting willingness to adopt climate insurance among smallholder farmers in Sri Lanka. *Clim. Risk Manag.* **2023**, *42*, 100575.
7. Amerasinghe, F.P.; Konradsen, F.; Van Der Hoek, W.; Amerasinghe, P.H.; Gunawardena, J.; Fonseka, K.; Jayasinghe, G. *Small Irrigation Tanks as a Source of Malaria Mosquito Vectors: A Study in North-Central Sri Lanka*; 9290904615; International Water Management Institute (IWMI): Colombo, Sri Lanka, 2001; p. 37.
8. Amerasinghe, F.P.; Konradsen, F.; Fonseka, K.T.; Amerasinghe, P.H. Anopheline (Diptera: Culicidae) breeding in a traditional tank-based village ecosystem in north central Sri Lanka. *J. Med. Entomol.* **1997**, *34*, 290–297.
9. Anuradha, J.; Fujimura, M.; Inaoka, T.; Sakai, N. The role of agricultural land use pattern dynamics on elephant habitat depletion and human-elephant conflict in Sri Lanka. *Sustainability* **2019**, *11*, 2818.
10. Ariyawanshe, I.; Fujimura, M.; Abeyrathne, A.; Kazunari, T. Fostering Collective Action in a Village-Tank Cascade-Based Community in Sri Lanka: An Illusion or Reality? *Sustainability* **2023**, *15*, 15168.
11. Avtar, R.; Herath, S.; Saito, O.; Gera, W.; Singh, G.; Mishra, B.; Takeuchi, K. Application of remote sensing techniques toward the role of traditional water bodies with respect to vegetation conditions. *Environ. Dev. Sustain.* **2014**, *16*, 995–1011.
12. Bebermeier, W.; Meister, J.; Withanachchi, C.R.; Middelhaufe, I.; Schütt, B. Tank cascade systems as a sustainable measure of watershed management in South Asia. *Water* **2017**, *9*, 231.
13. Bebermeier, W.; Abeywardana, N.; Susarina, M.; Schütt, B. Domestication of water: Management of water resources in the dry zone of Sri Lanka as living cultural heritage. *WIREs Water* **2023**, *10*, e1642.
14. Chandrajith, R.; Mahatantila, K.; Jayasena, H.; Tobschall, H. Geochemical characteristics of sediments from a reservoir (tank) ecosystem in Sri Lanka. *Paddy Water Environ.* **2008**, *6*, 363–371.
15. Dayananda, D.; Weerahewa, J.; Weerasooriya, S. Water availability, crop choices and profitability of farming: A case study of Mahakanumulla tank village. *Trop. Agric. Res.* **2021**, *32*, 81–94.
16. Dayananda, D.; Weerahewa, J.; Weerasooriya, S.A. Resource-use efficiency and environmental sustainability in the village tank cascade systems in the dry zone of Sri Lanka: An assessment using a bio-economic model. *Front. Sustain. Food Syst.* **2023**, *7*, 1084973.
17. De Silva, C.S. Sustainable groundwater resource management in the Thirappane tank cascade system. *J. Natl. Sci. Found. Sri Lanka* **2002**, *30*, 97–108.
18. Dharmasena, P. Conservation farming practices for small reservoir watersheds: A case study from Sri Lanka. *Agrofor. Syst.* **1994**, *28*, 203–212.
19. Dharmasena, P. Evolution of hydraulic societies in the ancient Anuradhapura Kingdom of Sri Lanka. In *Landscapes and Societies*; Springer: Berlin/Heidelberg, Germany, 2010; pp. 341–352.
20. Dharmasena, P. Cascaded Tank-Village System: Present Status and Prospects. In *Agricultural Research for Sustainable Food Systems in Sri Lanka*; Springer: Berlin/Heidelberg, Germany, 2020; pp. 63–75.
21. Dharmasena, P. Lessons Learnt from Development Projects to Restore Tank Cascades. In Proceedings of the Cascade Ecology and Management (CEM) Conference, Peradeniya, Sri Lanka, 17–18 September 2021; Weerasooriya, S.A., Ed.; Faculty of Agriculture, University of Peradeniya: Peradeniya, Sri Lanka, 2021; pp. 24–26.
22. Dharma-Wardana, M.; Amarasiri, S.L.; Dharmawardene, N.; Panabokke, C. Chronic kidney disease of unknown aetiology and ground-water ionicity: Study based on Sri Lanka. *Environ. Geochem. Health* **2015**, *37*, 221–231.
23. Dilini, M.; Gunawardena, E.; Pathmarajah, S. Impacts of water scarcity induced adaptation strategies on livelihood and household food security of farming community of horivila-palugaswewa and sivalakulama cascades of Sri Lanka. *Trop. Agric. Res.* **2021**, *32*, 418–425.
24. Dissanayake, S.T.; Vidanage, S.P. Choice Experiment Analysis of Non-market Values of Ecosystem Services. In *Agricultural Policy Analysis: Concepts and Tools for Emerging Economies*; Springer: Berlin/Heidelberg, Germany, 2022; pp. 331–362.
25. Dissanayake, S.T.; Vidanage, S. Valuing ecosystem services from restoring ancient irrigation systems: An application comparing labor vs. monetary payments for choice experiments. *Agric. Resour. Econ. Rev.* **2023**, *52*, 422–449.

26. Fernando, K.D.; Shantha, W.H.A.; Gunawardena, W.L. Spatial Management Planning for Restoration of Small Tank Cascade System In Sri Lanka. In Proceedings of the 39th Asian Conference on Remote Sensing, Kuala Lumpur, Malaysia, 15–18 October 2018; Asian Association on Remote Sensing (AARS): Kuala Lumpur, Malaysia, 2018; p. 428.
27. Fernando, W.W.M.J. Recycling and Disposal of Agrochemical Waste: A Sustainable Model for an Agrarian Village. In Proceedings of the Cascade Ecology & Management (CEM) Conference, Peradeniya, Sri Lanka, 17–18 September 2021; Weerasooriya, S.A. Ed.; University of Peradeniya: Peradeniya, Sri Lanka, 2021; pp. 144–146.
28. Gangadhara, K.; Jayasena, H. Rainwater Harvest by Tank Cascades in Sri Lanka Was It a Technically Adapted Methodology by the Ancients. In Proceedings of the Twelfth International Conference on Rain Water Catchment Systems, International Rainwater Catchment Systems Association (IRCSA), New Delhi, India, 12 November 2005; International Rainwater Catchment Systems Association (IRCSA): New Delhi, India, 2005.
29. Geekiyanage, N.; Pushpakumara, D. Ecology of ancient tank cascade systems in island Sri Lanka. *J. Mar. Isl. Cult.* **2013**, *2*, 93–101.
30. Gilliland, K.; Simpson, I.A.; Adderley, W.P.; Burbidge, C.I.; Cresswell, A.J.; Sanderson, D.C.; Coningham, R.A.E.; Manuel, M.; Strickland, K.; Gunawardhana, P. The dry tank: Development and disuse of water management infrastructure in the Anuradhapura hinterland, Sri Lanka. *J. Archaeol. Sci.* **2013**, *40*, 1012–1028.
31. Godage, G.G.C.P.; Ekanayake, W.E.M.L.J.; Hulugalla, W.M.M.P. Characterization of the Nutritional and Botanical Composition of Naturally-grown Pastures in Mahakanumulla Cascade System in North Central Province, Sri Lanka. In Proceedings of the Cascade Ecology & Management (CEM) Conference, Peradeniya, Sri Lanka, 17–18 September 2021; Weerasooriya, S.A., Ed.; Faculty of Agriculture, University of Peradeniya: Peradeniya, Sri Lanka, 2021; pp. 50–53.
32. Gunarathna, M.; Kumari, M. Sustainable management of Malwathu Oya cascade-I: Present status and future needs. *GSTF J. Agric. Eng. (JAE)* **2014**, *1*, 1.
33. Gunasekara, U.; Korale-Gedara, P.; Gunathilaka, D. Preferences of inland fishers for different management attributes in village tank cascade systems in Sri Lanka. *Agric. Syst.* **2023**, *208*, 103644.
34. Hemachandra, E.; Dayawansa, N.; De Silva, R.P. A Sustainability Index for Assessing Village Tank Cascade Systems (VTCs) in Sri Lanka. In *Water Management: A View from Multidisciplinary Perspectives*, Springer: Berlin/Heidelberg, Germany, 2022; pp. 299–317.
35. Hemachandra, E.; Dayawansa, N.; De Silva, R. Application of Standard Precipitation Index (SPI) to Assess Rainfall variability in a Major Agricultural Area in Dry Zone of Sri Lanka. *Trop. Agric. Res.* **2021**, *32*, 276–286.
36. Herath, S.; Mishra, B.; Wong, P.; Weerakoon, S. Mosaic of Traditional and Modern Agriculture Systems for Enhancing Resilience. In *Resilient Asia. Science for Sustainable Societies*; Takeuchi, K.; Saito, O.; Matsuda, H.; Mohan, G., Eds.; Springer: Tokyo, Japan, 2018; pp. 151–187.
37. Hettiarachchi, T.P.; Sumanapala, A.P.; Ranasinghe, T. A Rapid Assessment of the Diversity and Composition of Arthropods in an Ellanga Agricultural System in Sri Lanka. In Proceedings of the Cascade Ecology & Management Conference, Peradeniya, Sri Lanka, 17–18 September 2021; Weerasooriya, S.A., Ed.; Faculty of Agriculture, University of Peradeniya: Peradeniya, Sri Lanka, 2021; pp. 96–97.
38. Imbulana, N.; Manoharan, S. Hydrological and water balance studies to evaluate options for climate resilience in smallholder irrigation systems in Sri Lanka. *Water Policy* **2020**, *22*, 1024–1046.
39. Itakura, J. *Water Balance Model for Planning Rehabilitation of A Tank Cascade Irrigation System in Sri Lanka (IWMI Working Paper 037)*; International Water Management Institute (IWMI): Colombo, Sri Lanka, 1995; p. 62.
40. Itakura, J.; Abernethy, C.L. *Water Management in A Tank Cascade Irrigation System in Sri Lanka: First seasonal report of TARC-IIMI Joint Project 1991/1992 Maha Season: (IWMI Working Paper 024)*; International Water Management Institute (IWMI): Colombo, Sri Lanka, 1993.
41. Izumi, A.; Hori, T. Applicability of water level monitoring system and water level estimation system to tank cascade in Sri Lanka. *JARQ-Jpn. Agr. Res. Q.* **2021**, *55*, 35–43.
42. Jayakody, B.; Mowjood, M.; Gunawardena, E. Modifying and testing of a cascade water balance model using a mini cascade system with two tanks. *Trop. Agric. Res.* **2004**, *16*, 159–170.
43. Jayasena, H.; Chandrajith, R.; Gangadhara, K. Water management in ancient Tank Cascade Systems (TCS) in Sri Lanka: Evidence for systematic tank distribution. *J. Geol. Soc. Sri Lanka* **2011**, *14*, 29–34.
44. Jayasiri, M.; Dayawansa, N.; Yadav, S. Assessing the roles of farmer organizations for effective agricultural water management in Sri Lanka. *Agric. Syst.* **2023**, *205*, 103587.
45. Jayasuriya, B.; Ranasinghe, D.; Maddumabandara, C. Socio-cultural, ecological and managerial perspectives of a selected cascade tank system in Anuradhapura district, Sri Lanka. *Int. J. Multidiscip. Stud.* **2017**, *4*, 41–42.
46. Jayathilaka, S.I.; Chandrasekara, A.; Silva, K.D.R.R. Nutritional Status, Prevalence of Non-Communicable Diseases, and Psychological Distress of Adults in Cascaded Tank-Village Systems in the Dry Zone of Sri Lanka: A Case Study. In Proceedings of the Cascade Ecology & Management Conference, Peradeniya, Sri Lanka, 17–21 September 2021; Weerasooriya, S.A., Ed.; Faculty of Agriculture, University of Peradeniya: Peradeniya, Sri Lanka, 2021; pp. 109–111.
47. Jayatilaka, C.; Sakthivadivel, R.; Shinogi, Y.; Makin, I.W.; Witharana, P. *Predicting Water Availability in Irrigation Tank Cascade Systems: The Cascade Water Balance Model*; IWMI: Colombo, Sri Lanka, 2001; Volume 48.
48. Jayatilaka, C.; Sakthivadivel, R.; Shinogi, Y.; Makin, I.W.; Witharana, P. A simple water balance modelling approach for determining water availability in an irrigation tank cascade system. *J. Hydrol.* **2003**, *273*, 81–102.

49. Kanthilanka, H.; Ramilan, T.; Farquharson, R.; Weerahewa, J. Optimal nitrogen fertilizer decisions for rice farming in a cascaded tank system in Sri Lanka: An analysis using an integrated crop, hydro-nutrient and economic model. *Agric. Syst.* **2023**, *207*, 103628.
50. Kariyawasam, C. Economic impact of micro catchment development. *J. Irrig. Drain. Eng.* **1989**, *115*, 568–576.
51. Kariyawasam, C.S.; Kumar, L.; Kogo, B.K.; Ratnayake, S.S. Long-Term Changes of Aquatic Invasive Plants and Implications for Future Distribution: A Case Study Using a Tank Cascade System in Sri Lanka. *Climate* **2021**, *9*, 31.
52. Kekulandala, B.; Jacobs, B.; Cunningham, R. Management of small irrigation tank cascade systems (STCS) in Sri Lanka: Past, present and future. *Clim. Dev.* **2020**, *13*, 337–347.
53. Kekulandala, B.; Cunningham, R.; Jacobs, B. Exploring social networks in a small tank cascade system in Northcentral Sri Lanka: First steps to establishing adaptive governance. *J. Environ. Dev.* **2023**, *46*, 100847.
54. Köpke, S.; Withanachchi, S.S.; Pathiranage, R.; Withanachchi, C.R.; Ploeger, A. Social–ecological dynamics in irrigated agriculture in dry zone Sri Lanka: A political ecology. *Sustain. Water Resour. Manag.* **2019**, *5*, 629–637.
55. Kowshayini, P.; Nayakekoral, H.; Pathmarajah, S. Tank sedimentation, soil erosion simulations and conservation interventions of the sub-catchments in palugaswewa tank cascade system, Sri Lanka. *Trop. Agric. Res.* **2023**, *34*, 304–315.
56. Kulasinghe, T.N.; Dharmakeerthi, R.S. Effects of land use type and tank components on soil properties and sustainability of tank cascade system in the Dry Zone of north central Sri Lanka. *Agric. Syst.* **2022**, *201*, 103474.
57. Kumari, M.; Sakai, K.; Kimura, S.; Nakamura, S.; Yuge, K.; Gunarathna, M.; Ranagalage, M.; Duminda, D. Interpolation methods for groundwater quality assessment in tank cascade landscape: A Study of Ulagalla Cascade, Sri Lanka. *Appl. Ecol. Environ. Res.* **2018**, *16*, 5359–5380.
58. Kumari, M.; Sakai, K.; Kimura, S.; Yuge, K.; Gunarathna, M. Classification of groundwater suitability for irrigation in the Ulagalla tank Cascade landscape by GIS and the analytic hierarchy process. *Agronomy* **2019**, *9*, 351.
59. Kumari, M.; Pathmarajah, S.; Dayawansa, N. Characterization of agro-well water in Malwathu Oya cascade-I in Anuradhapura district of Sri Lanka. *Trop. Agric. Res.* **2013**, *25*, 46–55.
60. Lasanthika, K.A.G.A.; Vitharana, U.W.A. Land use nad land cover change in the Kapriggama Tank Cascade System during 2010 to 2020. In Proceedings of the Cascade Ecology and Management, Peradeniya, Sri Lanka, 17–18 September 2021; Weerasooriya, S.A. Dayananda, M.T.D. Rajapaksha, A.D. Silva, P.S.H. Nayanathara, U.W.N.N. Wickramasinghe, M.R.C.P. Kulasinghe, G.T.N. Eds.; Faculty of Agriculture, University of Peradeniya: Peradeniya, Sri Lanka, 2021; pp. 132–138.
61. Madduma Bandara, C.M. Catchment ecosystems and village Tank Cascades in the dry zone of Sri Lanka a time-tested system of land and water resource management. In *Strategies for River Basin Management*; Lundqvist, J.L.U. Falkenmark, M. Eds.; The GeoJournal Library; Springer: Dordrecht, The Netherlands, 1985; Volume 6, pp. 99–113. [https://doi.org/10.1007/978-94-009-5458-8\\_11](https://doi.org/10.1007/978-94-009-5458-8_11).
62. Madduma Bandara, C.M. Tank Cascade Systems in Sri Lanka: Some thoughts on their development implications. In *Summaries of Papers Presented at Irrigation Research Management Unit Seminar Series During 1994*, Haq, K.A.; Wijayarathne, C.M.; Samarasekera, B.M.S. Eds. International Water Management Institute (IWMI): Colombo, Sri Lanka, 1995; p. 14.
63. Mahatantila, K.; Chandrajith, R.; Jayasena, H.; Ranawana, K. Spatial and temporal changes of hydrogeochemistry in ancient tank cascade systems in Sri Lanka: Evidence for a constructed wetland. *Water Environ. J.* **2008**, *22*, 17–24.
64. Mahatantila, K.; Chandrajith, R.; Jayasena, H.; Marasinghe, S. Water Quality Variation in a Tank Cascade Irrigation System: A Case Study from Malagane Cascade, Sri Lanka. In *Survival and Sustainability*, Springer: Berlin/Heidelberg, Germany, 2010; pp. 1345–1353.
65. Marambe, B.; Pushpakumara, G.; Silva, P. Biodiversity and agrobiodiversity in Sri Lanka: Village tank systems. In *The Biodiversity Observation Network in the Asia-Pacific Region*, Springer: Berlin/Heidelberg, Germany, 2012; pp. 403–430.
66. Matsuno, Y.; Tasumi, M.; van der Hoek, W.; Sakthivadivel, R.; Otsuki, K. Analysis of return flows in a tank cascade system in Sri Lanka. *Paddy Water Environ.* **2003**, *1*, 173–181.
67. Melles, G.; Perera, E.D. Resilience thinking and strategies to reclaim sustainable rural livelihoods: Cascade Tank-Village System (CTVS) in Sri Lanka. *Challenges* **2020**, *11*, 27.
68. Menike, A.R.M.M.P.; Hemachandra, E.M.G.P.; Dayawansa, N.D.K.; Galagedara, L.W.; Mowjood, M.I.M. In *Assessment of the Mitigation Capacity of Village Tank Cascade System (VTCS) on Climatic Extremes (Flood and Drought) Using Standard Precipitation Index (SPI)*, Proceedings of Cascade Ecology and Management (CEM) Conference, Peradeniya, Sri Lanka, 17–18 September 2021; Weerasooriya, S.A.; Dayananda, M.T.D.; Rajapaksha, A.D.; Silva, P.S.H.; Nayanathara, U.W.N.N.; Wickramasinghe, M.R.C.P.; Kulasinghe, G.T.N., Eds.; Faculty of Agriculture, University of Peradeniya: Peradeniya, Sri Lanka, 2021; pp. 47–49.
69. Molden, D.; Sakthivadivel, R. Water accounting to assess use and productivity of water. *Int. J. Water Resour. Dev.* **1999**, *15*, 55–71.
70. Murray, F.; Little, D. *The Nature of Small-Scale Farmer Managed Irrigation Systems in North West Province, Sri Lanka and Potential for Aquaculture*; Institute of Aquaculture, University of Stirling: Stirling, UK, 2000.
71. Nanthakumaran, A.; Kadupitiya, H.; Devaisy, S.; Athukorale, W. Exploring the village tank cascade systems (VTCSs) in Vavuniya district, Sri Lanka. *J. Water Clim. Change* **2022**, *13*, 999–1006.
72. Nayanathara, N.; Hemachandra, D. An Assessment of the Food environment in the Mahakanumulla Village Tank Cascade System. In Proceedings of the Cascade Ecology & Management (CEM) Conference, Peradeniya, Sri Lanka, 17–18 September 2021; Weerasooriya, S.A., Ed.; Faculty of Agriculture, University of Peradeniya: Peradeniya, Sri Lanka, 2021; pp. 105–108.



73. Panabokke, C.R.; Sakthivadivel, R.; Weerasinghe, A.D. *Evolution, Present Status and Issues Concerning Small Tank Systems in Sri Lanka*; International Water Management Institute (IWMI): Battaramulla, Sri Lanka, 2002.
74. Panabokke, C.R.; Ariyaratne, B.R.; Seneviratne, A.; Wijekoon, D.; Molle, F. *Characterization and Monitoring of The Regolith Aquifer within Four Selected Cascades (Sub-Watersheds) of the Malala Oya Basin*; 9290906766; International Water Management Institute (IWMI): Battaramulla, Sri Lanka, 2008; p. 45.
75. Paranage, K. Understanding the relationship between water infrastructure and socio-political configurations: A case study from Sri Lanka. *Water* **2018**, *10*, 1402.
76. Perera, K.; Wijayarathna, N.; Jayatillake, H.; Manathunge, J.; Priyadarshana, T. Spillway Modernization for Improving Robustness of Village Tank Cascades for Floods, Sri Lanka. In Proceedings of the 2020 Moratuwa Engineering Research Conference (MERCon), Moratuwa, Sri Lanka, 28–30 July 2020; Institute of Electrical and Electronics Engineers (IEEE): Moratuwa, Sri Lanka, 2020; pp. 360–365.
77. Perera, K.; Wijayarathna, T.; Jayatillake, H.; Manatunge, J.; Priyadarshana, T. Hydrological principle behind the development of series of bunds in ancient tank cascades in small catchments, Sri Lanka. *Water Pract. Technol.* **2020**, *15*, 1174–1189.
78. Perera, K.; Wijayarathna, T.; Jayatillake, H.; Manatunge, J.; Priyadarshana, T. Framework for the sustainable development of village tanks in cascades as an adaptation to climate change and for improved water security, Sri Lanka. *Water Policy* **2021**, *23*, 537–555.
79. Perera, K.; Wijayarathna, T.; Jayatillake, H.; Priyadarshana, T.; Manatunge, J. Implications of storage state behaviour of village tanks in adaptation to climate change, Sri Lanka. *J. Water Clim. Change* **2021**, *12*, 844–857.
80. Ranasinghe, R.D.A.K.; Korale-Gedara, P.M.; Weerasooriya, S.A. Climate change adaptation and adaptive capacities of dairy farmers: Evidence from village tank cascade systems in Sri Lanka. *Agric. Syst.* **2023**, *206*, 103609.
81. Ratnayake, S.S.; Reid, M.; Larder, N.; Kadupitiya, H.K.; Hunter, D.; Dharmasena, P.B.; Kumar, L.; Kogo, B.; Herath, K.; Kariyawasam, C.S. Impact of Climate Change on Paddy Farming in the Village Tank Cascade Systems of Sri Lanka. *Sustainability* **2023**, *15*, 9271.
82. Ratnayake, S.S.; Khan, A.; Reid, M.; Dharmasena, P.B.; Hunter, D.; Kumar, L.; Herath, K.; Kogo, B.; Kadupitiya, H.K.; Dammalage, T.; et al. Land Use-Based Participatory Assessment of Ecosystem Services for Ecological Restoration in Village Tank Cascade Systems of Sri Lanka. *Sustainability* **2022**, *14*, 10180.
83. Ratnayake, S.S.; Kumar, L.; Dharmasena, P.B.; Kadupitiya, H.K.; Kariyawasam, C.S.; Hunter, D. Sustainability of Village Tank Cascade Systems of Sri Lanka: Exploring Cascade Anatomy and Socio-Ecological Nexus for Ecological Restoration Planning. *Challenges* **2021**, *12*, 24.
84. Ratnayake, S.S.; Reid, M.; Hunter, D.; Larder, N.; Silva, R.; Kadupitiya, H.; Pushpakumara, G.; Borelli, T.; Mendonce, S.; Liyanage, A. Exploring Social-Ecological Systems for Mainstreaming Neglected and Underutilised Plant Foods: Local Solutions to Food Security Challenges in Sri Lanka. In *Neglected Plant Foods Of South Asia: Exploring and Valorizing Nature to Feed Hunger*; Springer: Berlin/Heidelberg, Germany, 2023; p. 186.
85. Saase, R.; Schütt, B.; Bebermeier, W. Analyzing the dependence of major tanks in the headwaters of the Aruvi Aru catchment on precipitation. Applying drought indices to meteorological and hydrological data. *Water* **2020**, *12*, 2941.
86. Sakthivadivel, R.; Brewer, J.D. Water resources development planning in a basin context in the absence of good hydrologic data: An example from Sri Lanka. *Int. J. Water Resour. Dev.* **1999**, *15*, 73–91.
87. Sakthivadivel, R.; Fernando, N.; Brewer, J.D. *Rehabilitation Planning for Small Tanks in Cascades: A Methodology Based on Rapid Assessment*; International Water Management Institute (IWMI): Battaramulla, Sri Lanka, 1997; p. 32.
88. Schütt, B.; Bebermeier, W.; Meister, J.; Withanachchi, C.R. Characterisation of the Rota Wewa tank cascade system in the vicinity of Anuradhapura, Sri Lanka. *DIE ERDE—J. Geogr. Soc. Berl.* **2013**, *144*, 51–68.
89. Seenithamby, M.; Nandalal, K. Water resource development planning around village cascades: Piloting of a scientific methodology in Yan Oya river basin of Sri Lanka. *Water Policy* **2021**, *23*, 946–969.
90. Senadeera, S.D.M.; Dayawansa, N.D.K.; De Silva, R.P. Water Scarcity and Crop Diversification with OFCs—A Study in Horivila-Palugaswewa Cascade in Anuradhapura, Sri Lanka. In Proceedings of the Cascade Ecology and Management (CEM) Conference, Peradeniya, Sri Lanka, 17–18 September 2021; Weerasooriya, S.A., Ed. Faculty of Agriculture, University of Peradeniya: Peradeniya, Sri Lanka, 2021; pp. 42–46.
91. Senaratne, A.; Wickramasinghe, K. *Commons vs. Commons: Managing Scarce Water Resources in Dry Zone Village Tank Systems in Sri Lanka (EEPSEA Research Report No.2010-RR13)*; 9810889992; The Economy and Environment Program for Southeast Asia (EEPSEA): Ho Chi Minh City, Vietnam, 2011; p. 53.
92. Sewwandi, T.; Fernando, N. An Iterative Dynamic Model for Simulating the Pollutant Distributions in the Tank Cascade Ecosystems of Sri Lanka. *Environ. Model. Assess.* **2023**, *28*, 503–518.
93. Shannon, K.; Manawadu, S. Indigenous landscape urbanism: Sri Lanka's reservoir & tank system. *J. Landsc. Archit.* **2007**, *2*, 6–17.
94. Shinogi, Y.; Makin, I.W.; Witharana, D.P. Simulation of The Water Balance in A Dry Zone Tank Cascade. In Proceedings of the National Water Conference on Status and Future Directions of Water Research in Sri Lanka (Paper 68 of Session 2), BMICH, Colombo, Sri Lanka, 4–6 November 1998; International Water Management Institute (IWMI): Colombo, Sri Lanka, 1998; p. 21.
95. Silva, K.; Perera, O.; Sitisekara, S.; Madumali, K.; Ratnayake, R.; Chandrasekara, A.; Dharmasena, P.; Hunter, D. Household Food Security, Dietary Intakes and Dietary Diversity of Adults Living in Cascaded Tank-Village System in the Dry Zone of

- Sri Lanka. In Proceedings of the Cascade Ecology & Management (CEM) Conference, Peradeniya, Sri Lanka, 17–18 September 2021; Weerasooriya, S.A., Ed.; Faculty of Agriculture, University of Peradeniya: Peradeniya, Sri Lanka, 2021; pp. 99–101.
96. Sirimanna, S.; Prasada, D. Water productivity in tank cascade systems: A case study in Mahakanumulla tank cascade, Sri Lanka. *Trop. Agric. Res.* **2021**, *32*, 298–306.
  97. Sirimanna, S.; Kahathuduwa, K.; Prasada, D. Are cascade reservoir systems sustainable agroecosystems? A comparative assessment of efficiency, effectiveness and resource footprint in a Sri Lankan micro-cascade. *Agric. Syst.* **2022**, *203*, 103493.
  98. Sitisekara, S.; Madumali, K.; Ratnayake, R.; Chandrasekara, A.; Dharmasena, P.; Hunter, D.; Silva, K. Perceptions of Healthy Food Consumption Patterns, Food Security and Physical, Socioeconomic and Institutional Evolution of the Cascaded Tank-Village Systems: A Qualitative Case Study from the Dry Zone of Sri Lanka. In Proceedings of the Cascade Ecology & Management (CEM) Conference, Peradeniya, Sri Lanka, 17–18 September 2021; Weerasooriya, S.A., Ed.; Faculty of Agriculture, University of Peradeniya: Peradeniya, Sri Lanka, 2021; pp. 102–104.
  99. Sulochana, E.I.E.; Rajapaksha, R.M.C.P.; Vitharana, U.W.A. In *Spatial Variability in Selected Water Parameters along a Transect of the “Kappirigama” Tank Cascade System in Anuradhapura, Sri Lanka*, Proceedings of the Cascade Ecology and Management (CEM) Conference, Peradeniya, Sri Lanka, 17–18 September 2021; Weerasooriya, S.A., Ed. Faculty of Agriculture, University of Peradeniya: Peradeniya, Sri Lanka, 2021; pp. 54–57.
  100. Thilakarathne, J.; Wijayarathna, T. A Case Study on the Retention Tanks in the Walawe Ganga River Basin, Sri Lanka. In Proceedings of the Moratuwa Engineering Research Conference (MERCon), Moratuwa, Sri Lanka, 30 May–1 June 2018; IEEE: Piscataway, NJ, USA; pp. 482–487.
  101. Thilakasiri, K.; Kumara, G.; Galagedara, L.; Mowjood, M. Strategies to improve water productivity in small tank system: A case study from Kurunegala district in Sri Lanka. *Trop. Agric. Res.* **2015**, *26*, 684–692.
  102. Vidana Gamage, D.N.; Kulasinghe, H.P.G.T.N.; Dharmakeerthi, R.S. In *Revealing Scale and Location Specific Variability of Soil Organic Carbon in a Village Tank Cascade System in Sri Lanka*, Proceedings of the Cascade Ecology and Management (CEM) Conference, Peradeniya, Sri Lanka, 17–18 September 2021; Weerasooriya, S.A., Ed.; Faculty of Agriculture, University of Peradeniya: Peradeniya, Sri Lanka, 2021; pp. 63–66.
  103. Vidanage, S.P.; Kotagama, H.B.; Dunusinghe, P.M. Sri Lanka’s small tank cascade systems: Building agricultural resilience in the dry zone. In *Climate Change and Community Resilience*, Springer: Singapore, 2022; pp. 225–235.
  104. Weerahewa, J.; Dayananda, D. Land use changes and economic effects of alternative fertilizer policies: A simulation analysis with a bio-economic model for a Tank Village of Sri Lanka. *Agric. Syst.* **2023**, *205*, 103563.
  105. Welgama, N.; Wanigasundera, W. The Impact of Rehabilitation Approaches in the Sustainability of the Management of Small Tanks in Sri Lanka. *Int. J. Econ. Manag.* **2012**, *6*, 3744–3753.
  106. Wickramasinghe, M.R.C.P.; Dayawansa, N.D.K.; Jayasiri, M.M.J.G.C.N.; Silva, R.P.D. A study on external pressures of an ancient irrigation cascade system in Sri Lanka. *Agric. Syst.* **2023**, *205*, 103593.
  107. Wijekoon, W.; Gunawardena, E.; Aheeyar, M. Need for Institutional Reforms for Governance of Minor Irrigation Systems in Sri Lanka. In Proceedings of Water Professionals’ Day Symposium 2016, Kandy, Sri Lanka, 1 October 2016; Dayawansa, N.D.K., De Silva, R.P., Eds.; Postgraduate Institute of Agriculture (PGIA) & Geo-Informatics Society of Sri Lanka: Kandy, Sri Lanka, 2016; pp. 35–48.
  108. Wijesundara, W.; Nandasena, K.; Jayakody, A. Seasonal and spatial variations of N, P, K and Cd concentrations in water of the Mahakanumulla cascade in the dry zone of Sri Lanka. *Trop. Agric. Res.* **2013**, *24*, 279–288.
  109. Wijesundara, W.M.G.D.; Nandasena, K.A.; Jayakody, A.N. Hydro-chemical status of the mahakanumulla cascade in the dry zone Sri Lanka. *J. Soil Sci. Soc. Sri Lanka* **2014**, *24*, 15–20.
